# Supplementary material for: American Cochlear Implant Alliance Task Force Guidelines for Clinical Assessment and Management of Cochlear Implantation in Children With Single-Sided Deafness
Source: PubMed Central journal article supplement — Ear Hear. 2022 Feb 22;43(2):255–67. doi: 10.1097/AUD.0000000000001204 (PMC8862768; doi:10.1097/aud.0000000000001204), 2022-02-22
Supplement: aud-43-255-s001.pdf [file aud-43-255-s001.pdf]

|                                                                                                                                                                                                                                                                                                                                                                                                                                                                                                                                                                                                                                                                                                                                                                                                                                                                                                                                                                                                                                                                                                                                                                                                                                                                                                                                                                               |
|-------------------------------------------------------------------------------------------------------------------------------------------------------------------------------------------------------------------------------------------------------------------------------------------------------------------------------------------------------------------------------------------------------------------------------------------------------------------------------------------------------------------------------------------------------------------------------------------------------------------------------------------------------------------------------------------------------------------------------------------------------------------------------------------------------------------------------------------------------------------------------------------------------------------------------------------------------------------------------------------------------------------------------------------------------------------------------------------------------------------------------------------------------------------------------------------------------------------------------------------------------------------------------------------------------------------------------------------------------------------------------|
| <p><b>Hearing History</b></p> <p><i>Etiology</i></p> <ul style="list-style-type: none"> <li>• Implantation should be pursued quickly when SSD is secondary to bacterial meningitis and in etiologies where better ear progression is a concern.</li> <li>• Cochlear nerve deficiency (CND) is a contraindication to cochlear implantation in SSD.</li> </ul> <p><i>Duration of SSD</i></p> <ul style="list-style-type: none"> <li>• At this time families should be counseled that those with longer durations of deafness may experience less benefit than those with shorter durations of deafness.</li> </ul> <p><i>Tinnitus</i></p> <ul style="list-style-type: none"> <li>• Adult studies suggest reduction in tinnitus following implantation in cases of SSD but is not well studied in children.</li> </ul> <p><i>Experience with alternative hearing technologies</i></p> <ul style="list-style-type: none"> <li>• A trial period with a re-routing device is only recommended when the goal is to mitigate the impact of SSD without providing bilateral auditory input.</li> </ul> <p><i>Age at cochlear implantation</i></p> <ul style="list-style-type: none"> <li>• Auditory neural plasticity is known to be greatest during early childhood. Reducing the period of auditory deprivation by implanting early is likely in a child's best interest.</li> </ul> |
| <p><b>Imaging</b></p> <ul style="list-style-type: none"> <li>• High resolution 3D MRI is essential to diagnose CND, which has a high prevalence in this population.</li> </ul>                                                                                                                                                                                                                                                                                                                                                                                                                                                                                                                                                                                                                                                                                                                                                                                                                                                                                                                                                                                                                                                                                                                                                                                                |
| <p><b>Subjective Benefit</b></p> <ul style="list-style-type: none"> <li>• The following questionnaires are recommended for pre-operative and post-activation evaluation of subjective benefit. Tests should be chosen based on age and targeted behaviors. <ul style="list-style-type: none"> <li>○ Auditory Skill Development: Parents' Evaluation of Aural/Oral Performance of Children (PEACH)</li> <li>○ Quality of Life: HEAR-QL</li> <li>○ Hearing in Everyday Listening Environments: Speech, Spatial, and Qualities of Hearing (SSQ) for parent, child, and/or teacher</li> <li>○ Academic Performance: Screening Instrument for Targeting Educational Risk (SIFTER)</li> <li>○ Localization: SSQ for parent, child, and/or teacher or the Auditory Behavior in Everyday Life (ABEL)</li> <li>○ Tinnitus: Tinnitus Handicap Inventory (THI) or the Tinnitus Functional Index (TFI)</li> </ul> </li> </ul>                                                                                                                                                                                                                                                                                                                                                                                                                                                             |
| <p><b>Audiologic Assessment in Order of Priority</b></p> <p><i>Pre-operatively</i></p> <p>Threshold Assessment</p> <ul style="list-style-type: none"> <li>• Complete behavioral measurement of unaided hearing detection thresholds.</li> <li>• Objective testing for very young children and those who are unable to be tested behaviorally.</li> </ul>                                                                                                                                                                                                                                                                                                                                                                                                                                                                                                                                                                                                                                                                                                                                                                                                                                                                                                                                                                                                                      |

Spatial hearing: Speech in Noise (SIN)

- Assess in an unaided condition and/or with alternative hearing technology.
- Test configuration, both with and without device:
  - $S_0N_0$ : Target and masker presented at 0-degrees azimuth.
  - $S_0N_{ci}$ : Target presented at 0-degrees azimuth and masker presented 90-degrees to the affected ear.
  - $S_0N_{contra}$ : Target presented at 0-degrees azimuth and masker presented 90-degrees to the normal-hearing ear.
- Recommended test materials: See Table 1.

Word Recognition at 60 dBA

- In the sound field unaided
- In the sound field with hearing aid or alternative technology
- In the sound field with the hearing aid alone if applicable or required by insurance, with the contralateral ear masked via insert phone.
- Recommended test materials: See Table 1.

*Post-Activation*

Threshold Assessment

- Complete behavioral measurement of unaided hearing detection thresholds at regular intervals.
  - This is vital for the normal-hearing ear to assess hearing stability.
  - Recommended for the implanted ear to monitor hearing preservation.
- Assess sound field thresholds with the CI isolated.
  - Plug the contralateral ear and place a circumaural earmuff over the pinna.
  - Thresholds should be screened 10- 15 dB above where CI thresholds were obtained without the speech processor to ensure responses are not from the plugged and muffed ear.

Spatial hearing: SIN

- Test configuration, both with and without device:
  - $S_0N_0$ : Target and masker presented at 0-degrees azimuth.
  - $S_0N_{ci}$ : Target presented at 0-degrees azimuth and masker presented 90-degrees to the affected ear.
  - $S_0N_{contra}$ : Target presented at 0-degrees azimuth and masker presented 90-degrees to the normal-hearing ear.
- Recommended test materials: See Table 1.

Word Recognition

- Isolate the affected ear from the normal-hearing ear via direct audio input technology.
- Recommended test materials: See Table 1.

**Mapping**

- The normal-hearing ear should be occluded for behavioral measurement.
- Electrically Evoked Stapedial Reflex Thresholds (ESRTs) may be particularly useful in this population.
- Loudness balancing with the normal-hearing ear may be helpful.

- Clinicians should consider microphone placement when recommending devices.

### **Counseling**

- Realistic family and child-centered goals should be established pre-operatively.
- Alternative technologies should be discussed as part of pre-operative counseling.
- Families should be made aware of developmental risks of untreated SSD.

### **Aural Habilitation**

- Developmentally appropriate therapy is recommended post-activation to strengthen auditory skills with the CI alone and encourage development of binaural skills.
